# Supplementary material for: Mutations in CFAP43 and CFAP44 cause male infertility and flagellum defects in Trypanosoma and human
Source: PubMed Central journal article supplement (PMC5814398; doi:10.1038/s41467-017-02792-7), 2018-02-15
Supplement: 41467_2017_2792_MOESM1_ESM.pdf [file 41467_2017_2792_MOESM1_ESM.pdf]

# SUPPLEMENTARY INFORMATION

## SUPPLEMENTARY FIGURES

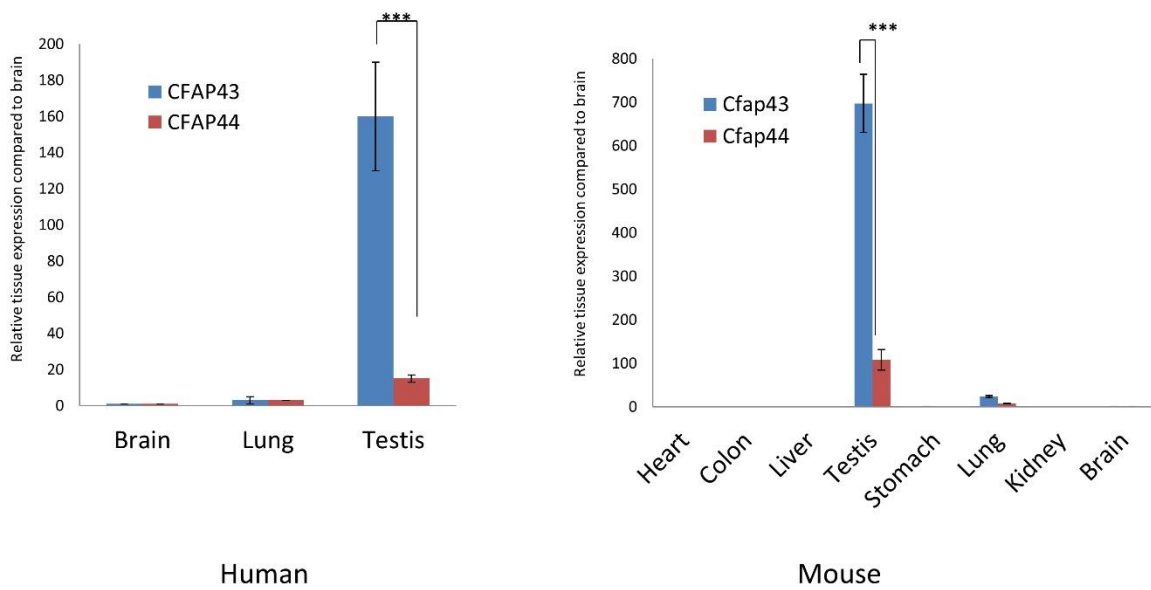

Coutton et al, supplementary Fig. 1

**Supplementary Figure 1. Relative mRNA Expression of human and mouse CFAP43 and CFAP44 transcripts.** *CFAP43* and *CFAP44* mRNA levels in a panel of human and mouse normal tissues. Results are presented as the mean of triplicates (ratio target gene/ACTB)  $\pm$  Standard Deviation (SD). RT-qPCR data were normalized using the reference gene ACTB with the  $-\Delta\Delta C_t$  method. Brain expression is arbitrarily set to 1. In human and mouse, *CFAP43* (blue columns) and *CFAP44* (red columns) have their strongest expression in testis compared to other organs. Unpaired t-test, \*\*\* $P < 0.001$ .

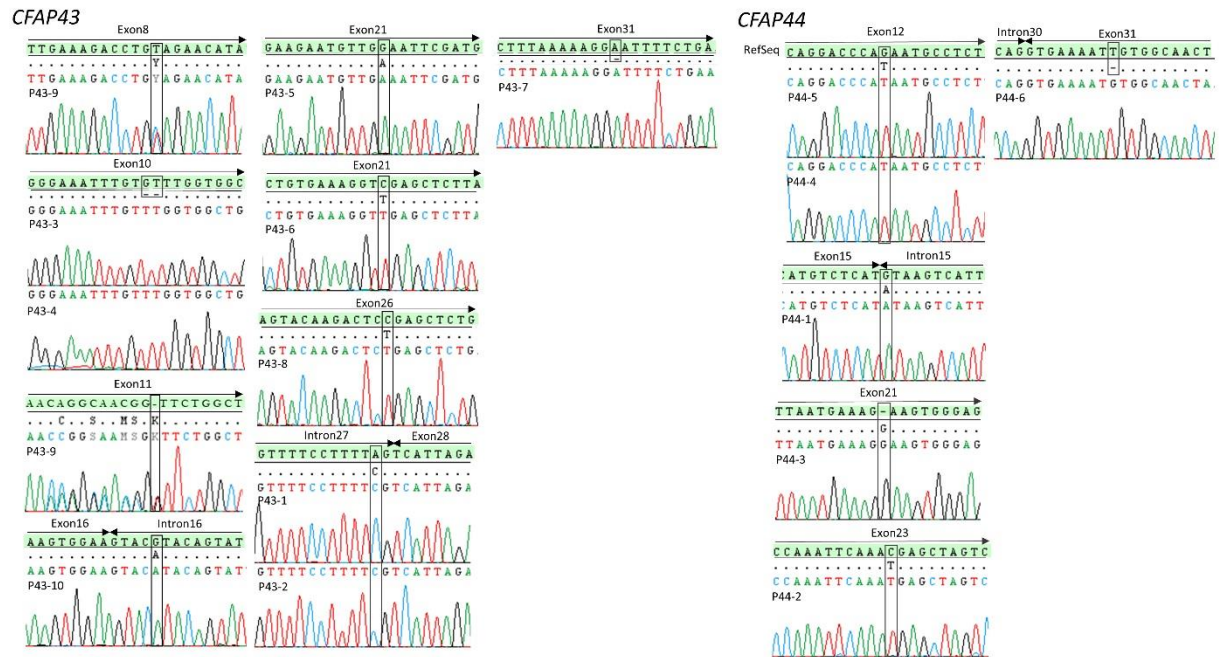

Coutton et al, supplementary Fig. 2

**Supplementary Figure 2. Electrophoregrams of Sanger sequencing for all CFAP43 and CFAP44 mutated patients compared to reference sequence.**



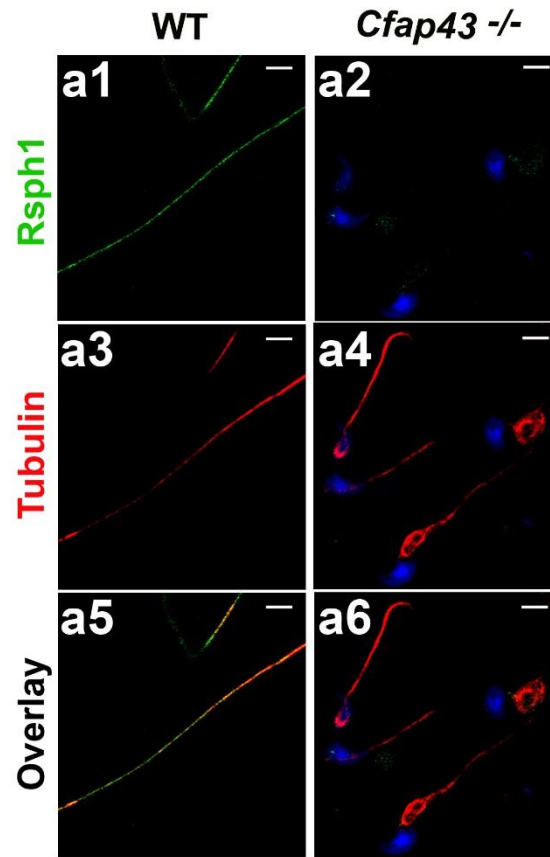

**Supplementary Figure 4. Head of radial spoke Rsph1 are absent in sperm from *Cfap43*<sup>-/-</sup> males. (a1,a3)** Staining of WT sperm with an anti-Rsph1 (a1, green) and anti-tubulin (a3, red) antibodies. (a5) overlay of Rsph1 and tubulin staining. Sperm were counterstained with Hoechst (blue). (a2, a4, a6) Similar experiments on sperm from *Cfap43*<sup>-/-</sup> males. Scale bars = 5  $\mu$ m.

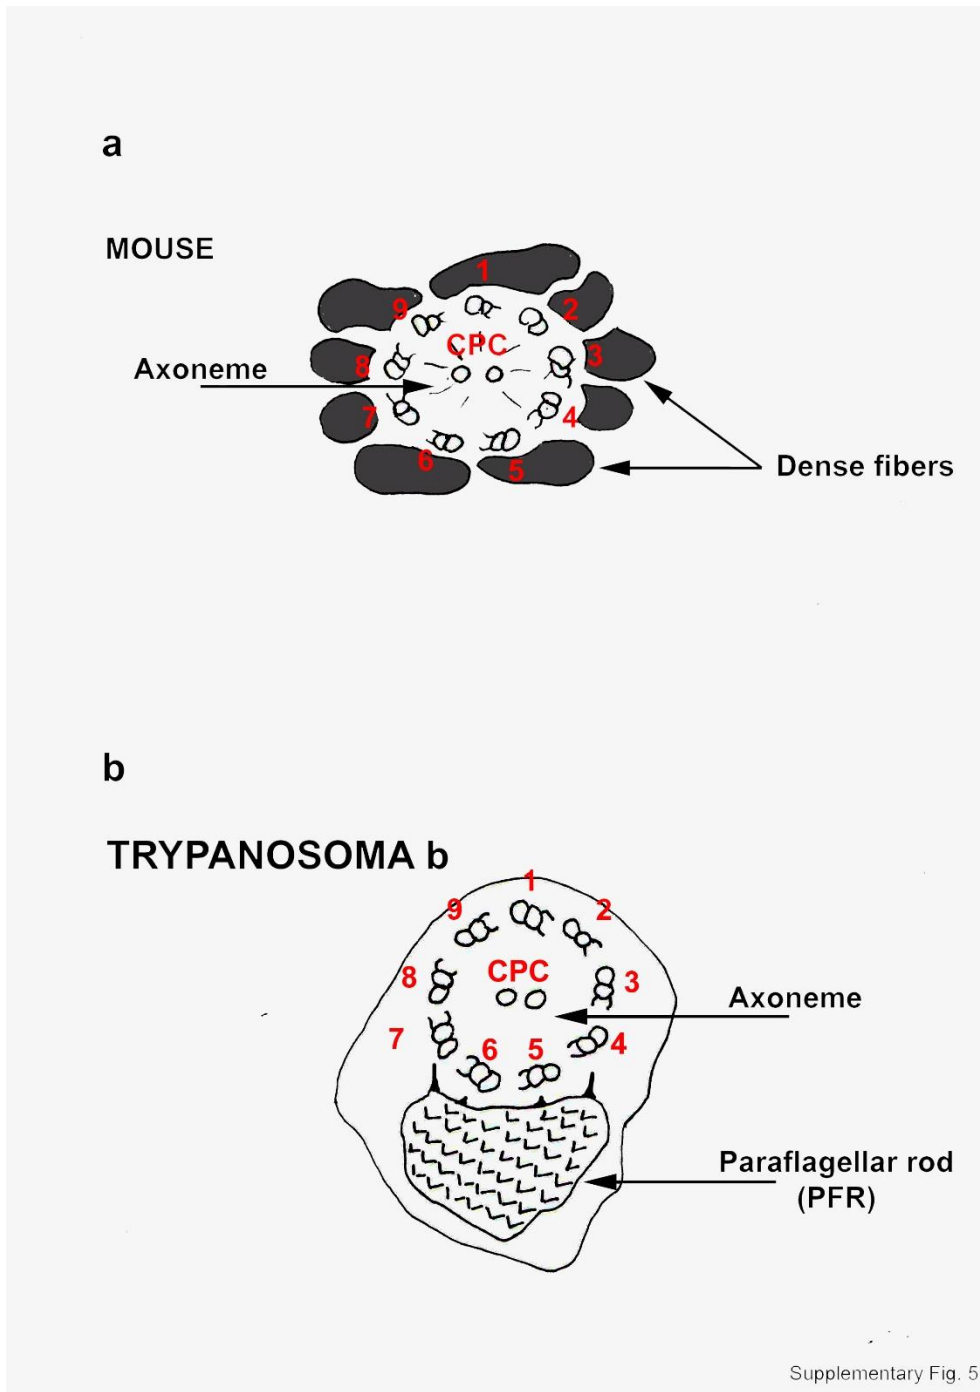

**Supplementary Figure 5. Drawing of the ultrastructure of mouse and *Trypanosoma b.* axonemes, showing the annotations of the DMTs.**

a. In mouse, drawing representing a section of the midpiece of the flagellum. The mitochondria and the plasma membrane are not represented. The axoneme is surrounded by 9 dense fibers.

b. In *Trypanosoma b.*, drawing representing a section of the flagellum and showing the organization of the axoneme and the PFR.

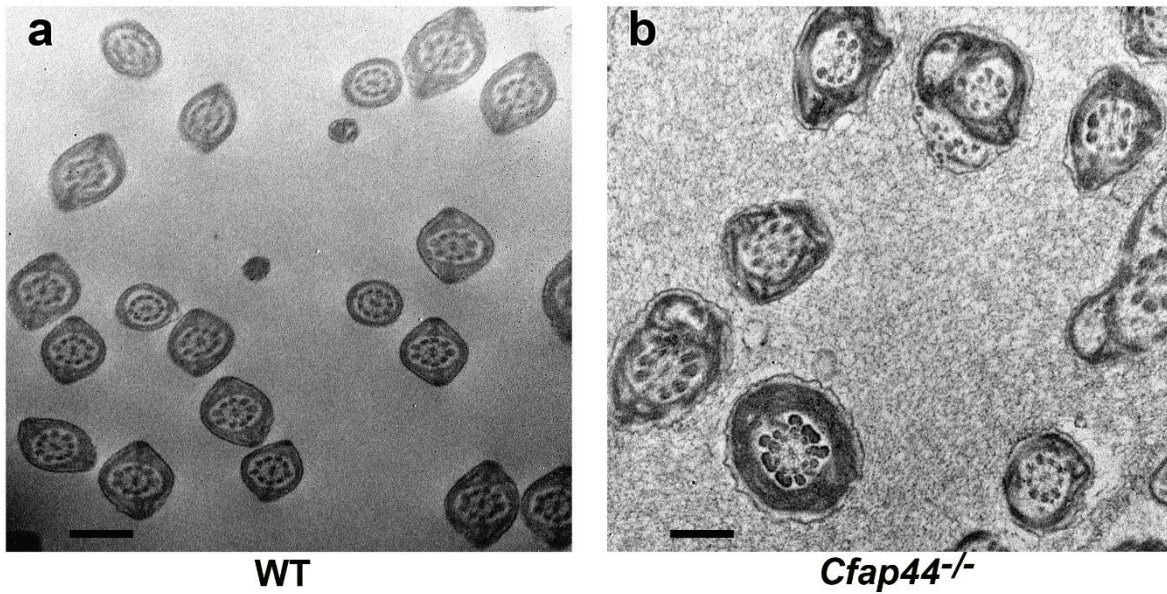

**Supplementary Figure 6. Electron microscopy images of the ultrastructure of sperm from WT and *Cfap44*<sup>-/-</sup> male at low magnification.**

**(a)** Note the uniform structure of the WT sperm. **(b)** In contrast, in *Cfap44*<sup>-/-</sup> sperm, the overall shapes of the flagella are heterogeneous. Scale bars = 402 nm.



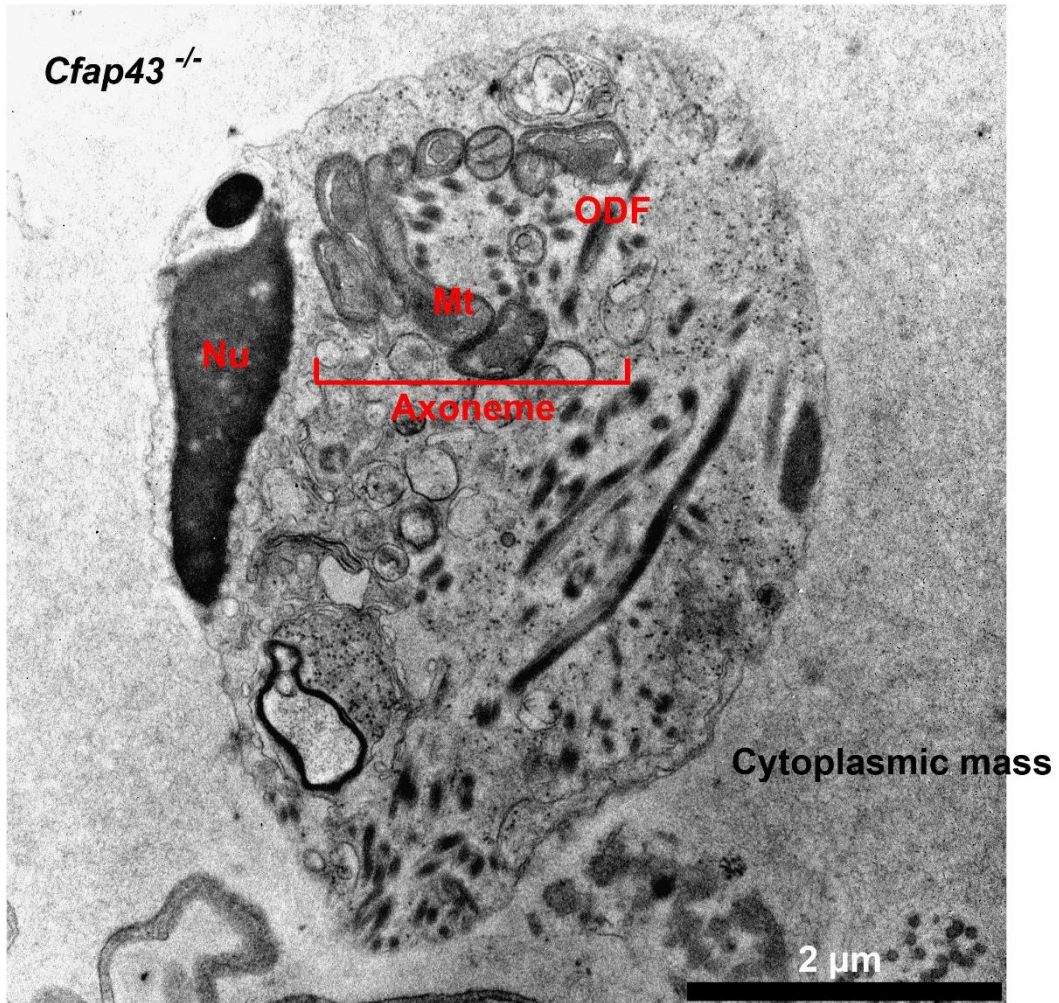

**Supplementary Figure 7. TEM of sperm from *Cfap43*<sup>-/-</sup> exhibiting a disorganized cytoplasmic mass.** Electron microscopy images of sperm from *Cfap43*<sup>-/-</sup> males show the absence of organized flagellum in short tail sperm. The short tail rather corresponds to an unorganized cytoplasmic mass containing the different components of the flagellum. scale bar = 2 μm.

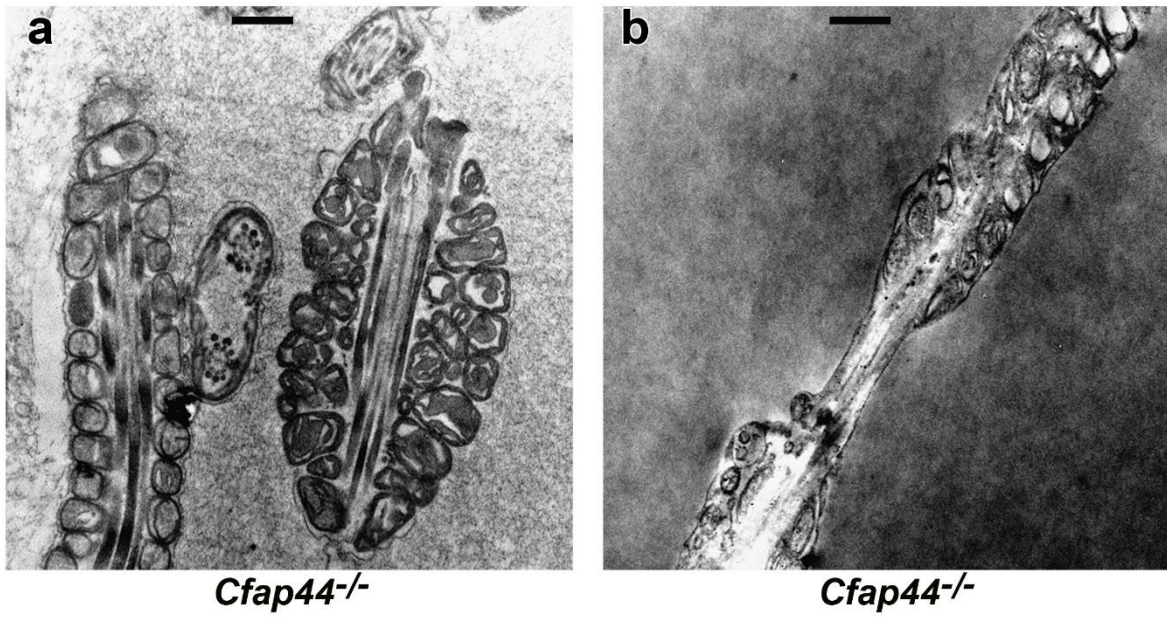

**Supplementary Figure 8. Defective mitochondria organization in sperm from *Cfap44*<sup>-/-</sup>**  
Longitudinal sections obtained by electron microscopy of sperm from *Cfap44*<sup>-/-</sup> males showing that the mitochondria are fragmented (**a**) and irregularly layered (**b**). Left image scale bar = 510 nm and right image scale bar = 395 nm.



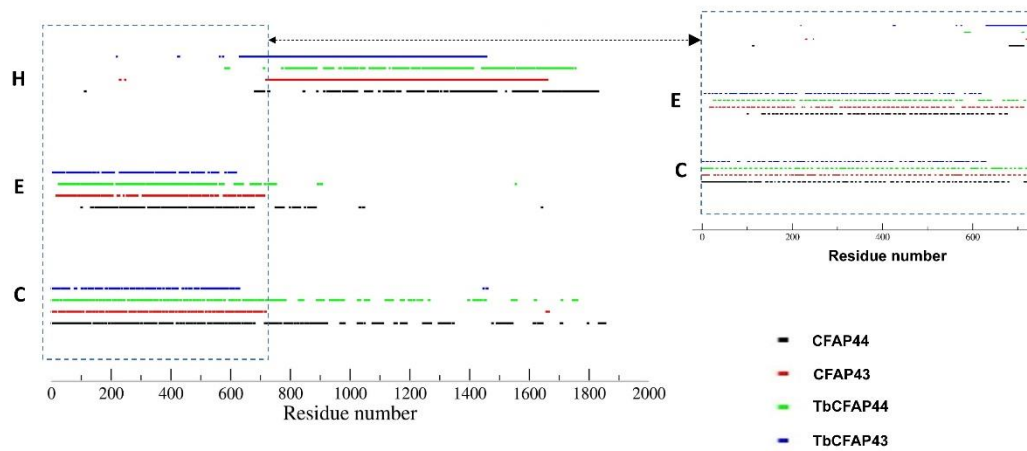

Coutton et al, Supplementary Fig. 9

**Supplementary Figure 9. Secondary structure prediction.** Elements of the secondary structures of the CFAP44, TbCFAP44, CFAP43, TbCFAP43 were predicted by Porter 4.0. C, E and H correspond to coils, extended conformations ( $\beta$ -sheets) and helices ( $\alpha$ -helices), respectively. C, E, H are shown for all residues and a detail of the N-ter  $\beta$ -domain is highlighted in the inset.

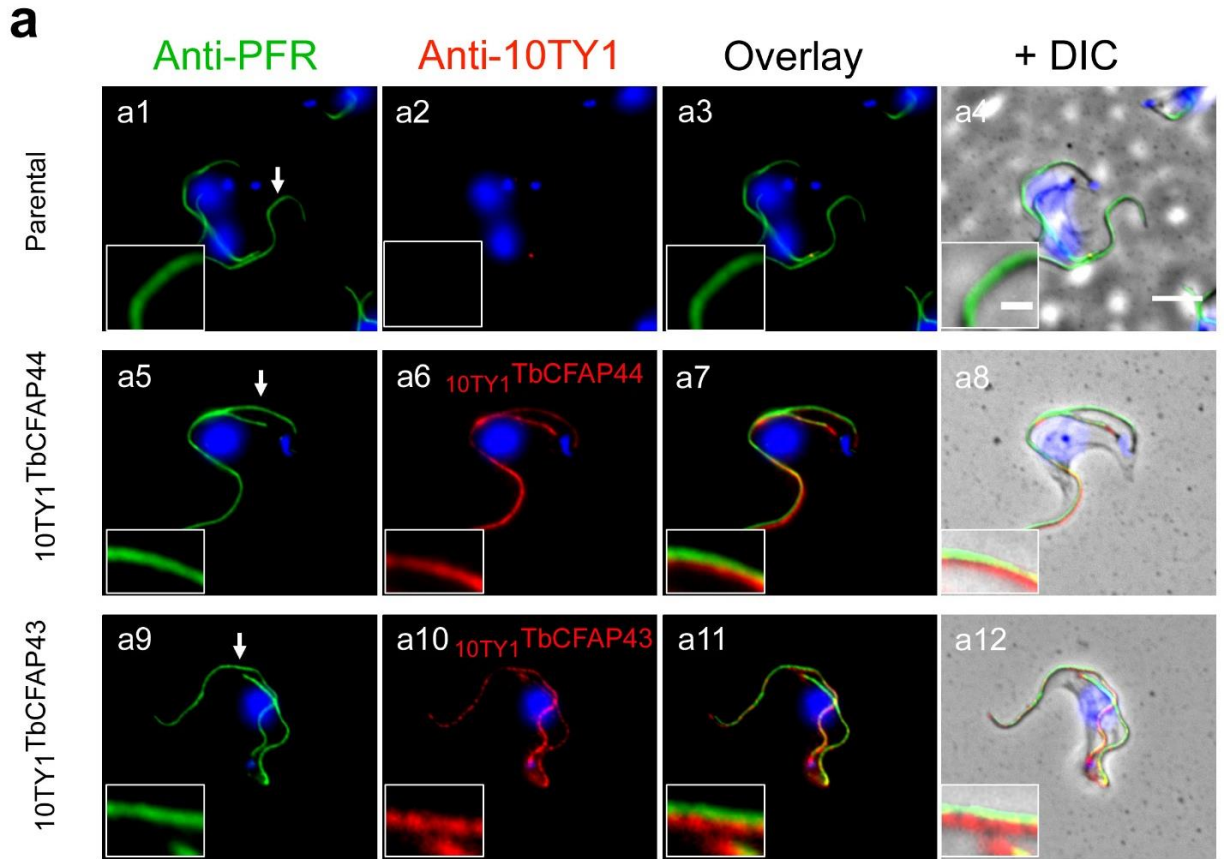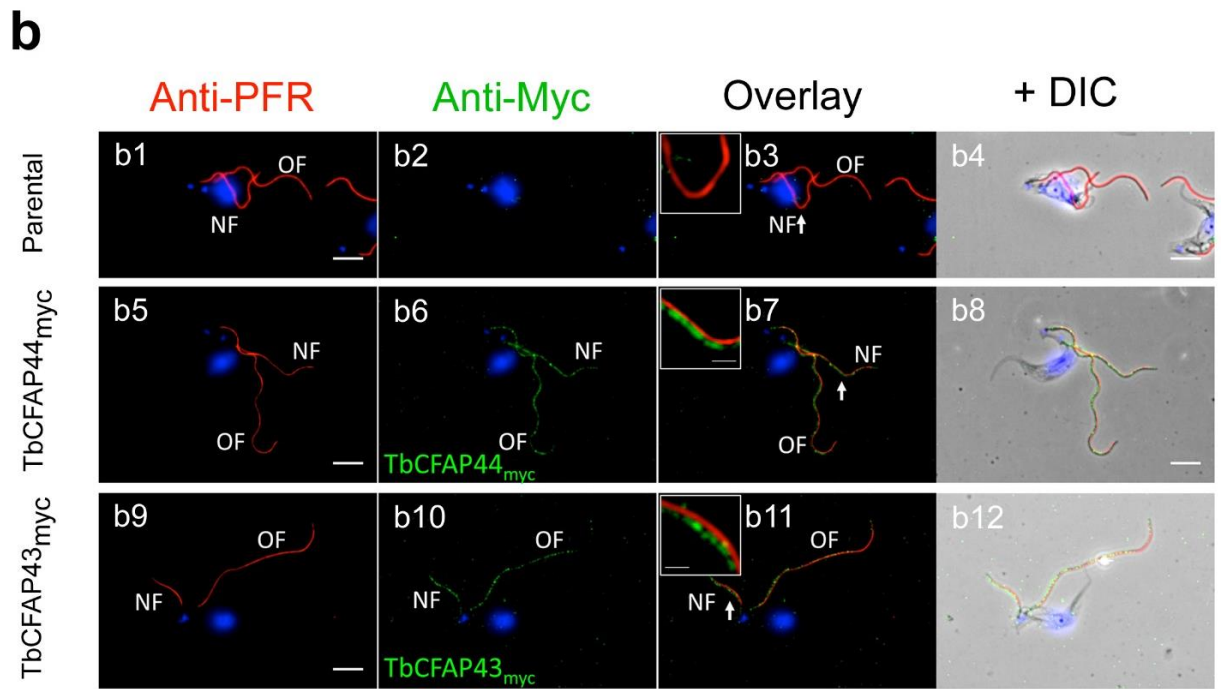

**Supplementary figure 10. Orthologs of *T. brucei* TbCFAP44 and TbCFAP43 are flagellar proteins.** (a) Localization of  $_{10TY1}$ TbCFAP44 and  $_{10TY1}$ TbCFAP43 were observed by IF. (a1-a4) Immunofluorescence on detergent extracted cells of parental *T. brucei* (non expressing myc-tagged proteins) stained with anti-PFR (green) and anti-TY1 (red) antibodies. No TY1 staining was observed on parental cells, confirming the specificity of the anti-TY1 antibody. (a5-a8) Immunofluorescence on detergent extracted cells constitutively expressing 10TY1-tagged TbCFAP44 and non-induced for *TbCFAP43<sup>RNAi</sup>*. The flagella were labelled with the anti-PFR (green), and 10TY1-tagged protein with anti-TY1 (green). Note the red staining of the entire flagellum showing that TbCFAP44 localisation is restricted to the flagellum. (a9-a12) Similar experiments as performed in a5-a8 for TbCFAP43. Insets are enlargement of images of flagella taken from the main panels and display areas indicated by white arrows (scale bar 1  $\mu$ m). Nuclei and kinetoplasts (mitochondrial genome) are labelled with DAPI (blue). Scale bars represent 5  $\mu$ m. (b). Similar experiments performed with TbCFAP44<sub>myc</sub> and TbCFAP43<sub>myc</sub> proteins and stained with anti-PFR (red) and anti-myc (green) antibodies. An identical localization of both proteins is observed with both tags.

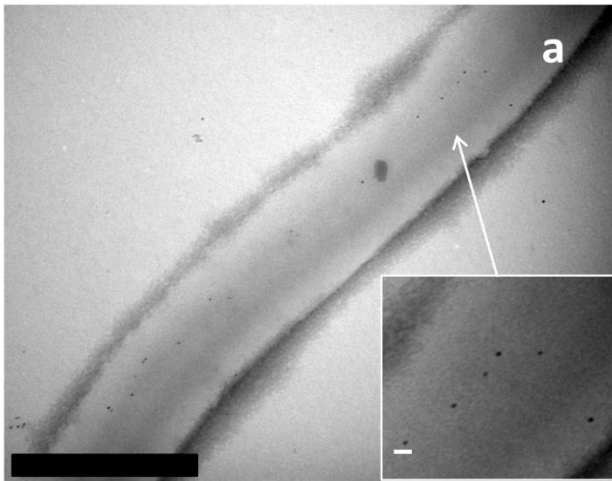

$^{10TY1}TbCFAP44$

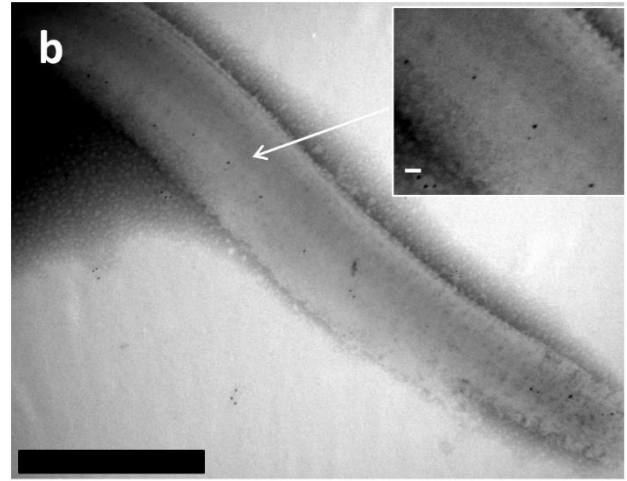

$^{10TY1}TbCFAP43$

**Supplementary Figure 11. Ultrastructural localization of  $^{10TY1}TbCFAP_{43}$  and  $^{10TY1}TbCFAP_{44}$ .**

Electron immuno-gold labelling of detergent-extracted cytoskeleton cells expressing  $^{10TY1}TbCFAP44$  (a) and of  $^{10TY1}TbCFAP43$  (b). Gold beads size was 6 nm. Scale bars represent 500 nm. Insets are enlargement of images of flagella taken from the main panels. Scale bars represent 10 nm.

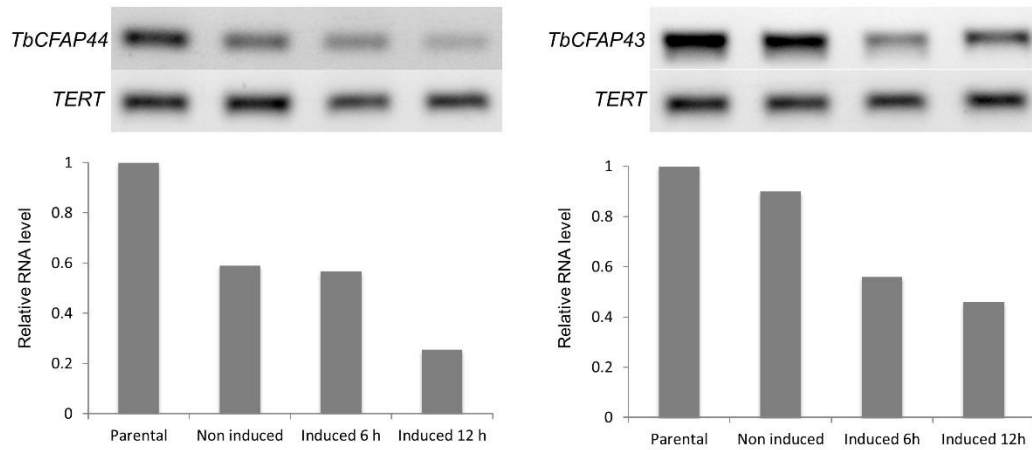

Supplementary Fig. 12

**Supplementary Figure 12. Quantification of *TbCFAP43* and *TbCFAP44* RNAi knockdown.**

Total RNA was isolated from parental and non-induced cells, and from 6 and 12h RNAi induced cells. mRNA decrease upon RNAi induction was tested by semi-quantitative RT-PCR using primer sets specific to *TbCFAP44* (left panel) or *TbCFAP43* (right panel) and quantified (lower panel) relative to the telomerase reverse transcriptase (*TERT*) level.



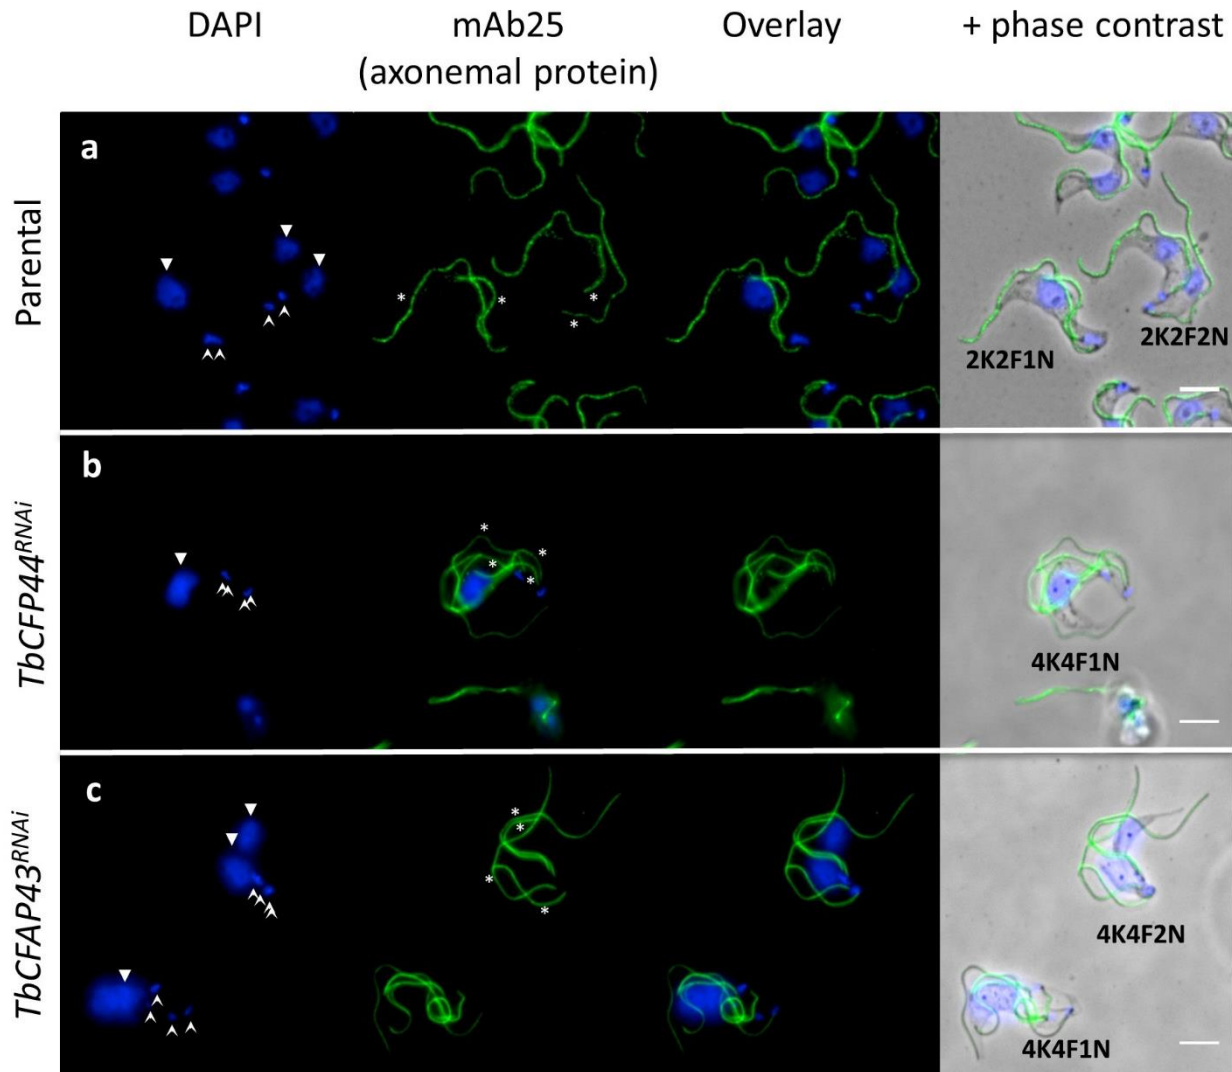

**Supplementary figure 13. Knockdown of *TbCFAP43* and *TbCFAP44* induces cytokinesis defects and produces multiflagellated cells.** Parental cells (**a**), and cells induced 24h for the RNAi of *TbCFPA44* (**b**) and *TbCFAP43* (**c**) were detergent extracted and methanol fixed. The flagella (F, asterisk) were immuno-labelled with mAb25, an anti-axonemal protein (green). Parental cells have 2 flagella whereas mutant cells have 4. The nuclei (N, triangle) and the kinetoplasts (K, arrow head) were labelled with DAPI. Scale bars 5  $\mu$ m. 4K4F2N means cell with 4 kinetoplasts, 4 flagella and 2 nuclei.

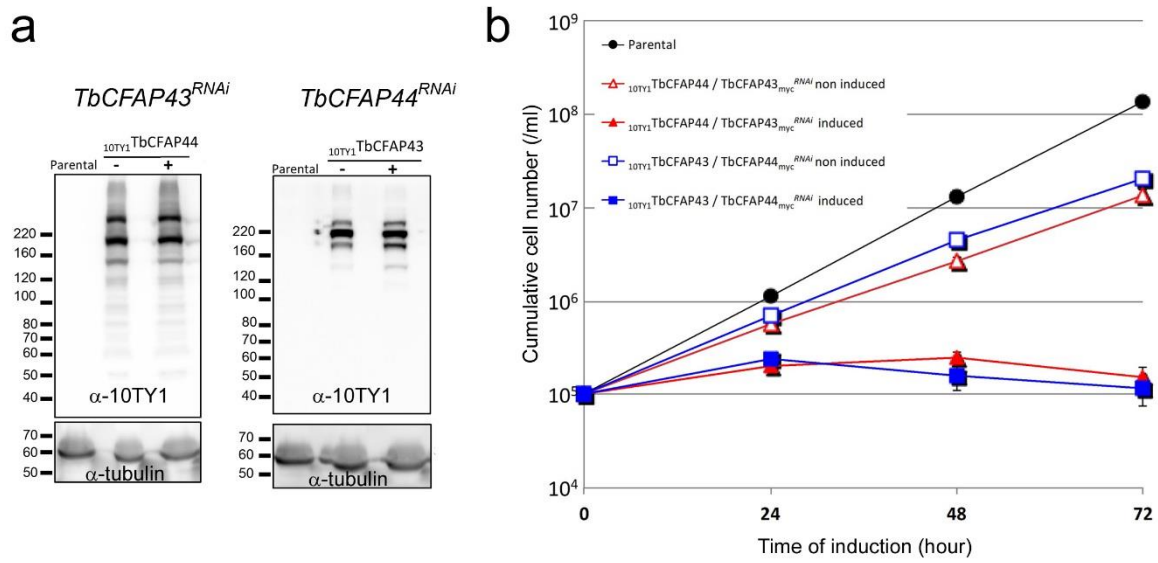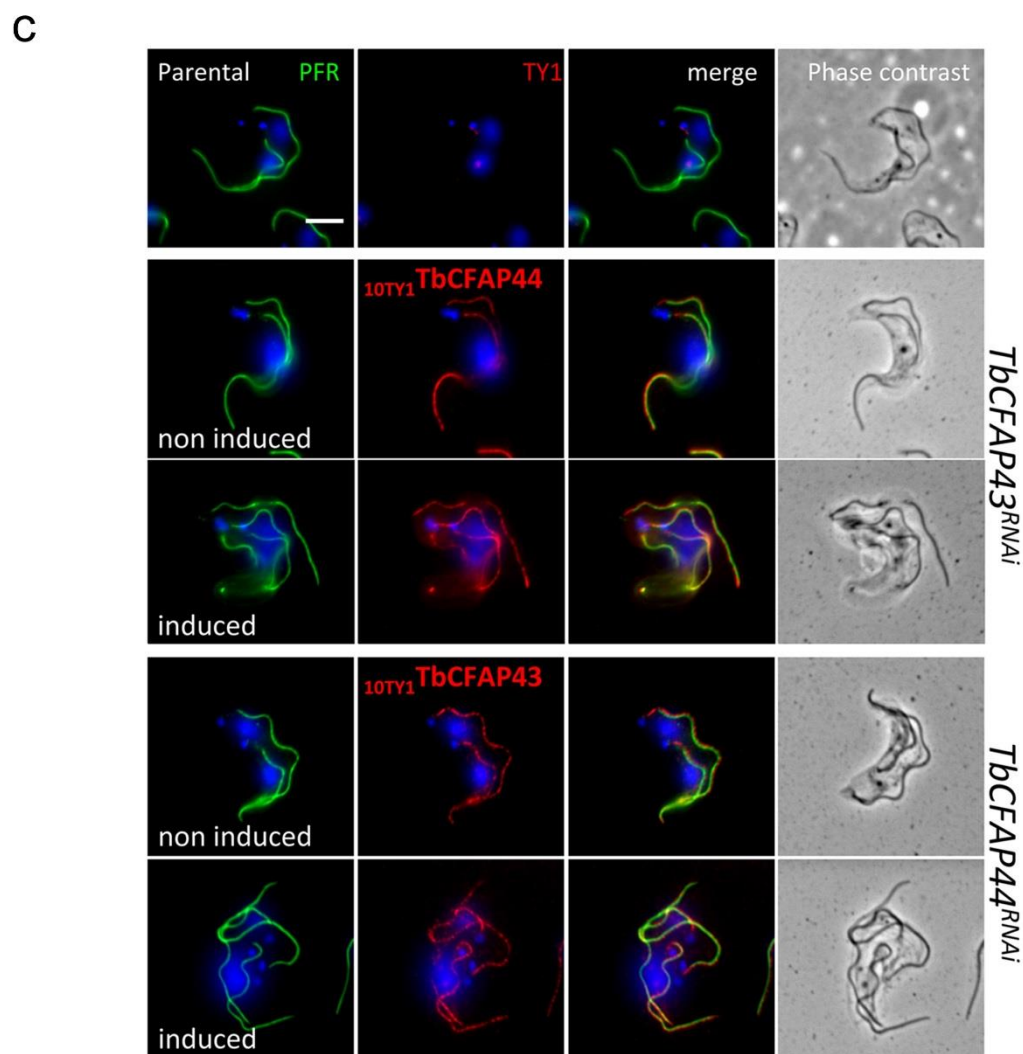

Supplementary Fig. 14

**Supplementary Figure 14. Expression of *TbCFAP43* does not rescue cell death induced by knock-down of *TbCFAP44* and vice versa. (a)** Western-blot analysis of the expression of endogenously tagged  $_{10TY1}TbCFAP44$  and  $_{10TY1}TbCFAP43$  in the background of the cell line  $TbCFAP43_{myc}/TbCFAP43$  RNAi and  $TbCFAP44_{myc}/TbCFAP44$  RNAi respectively. RNAi was non induced (-) or induced (+) for 24 h. Expected MM of  $_{10TY1}TbCFAP44$  is 213.7 KDa, and of  $_{10TY1}TbCFAP43$  is 180 KDa. Loading was controlled using anti-tubulin. Detergent-extracted cytoskeleton ( $2 \cdot 10^7$ ) were loaded on a 6% SDS-PAGE. **(b)** Growth curves for parental cells, and  $_{10TY1}TbCFAP44/TbCFAP43_{myc}^{RNAi}$  and  $_{10TY1}TbCFAP43/TbCFAP44_{myc}^{RNAi}$  cells, non-induced or induced with tetracycline. Cells were counted every 24 h. The graph represents the cumulative number of cells per ml. Error bars represent the standard error from 3 independent experiments. **(c)** Immunofluorescence on detergent extracted cells of parental *T. brucei* cell,  $_{10TY1}TbCFAP44/TbCFAP43_{myc}^{RNAi}$  and  $_{10TY1}TbCFAP43/TbCFAP44_{myc}^{RNAi}$  cells (non-induced or induced with tetracycline) and labelled with anti-PFR (green) and anti-TY1 (red) antibodies. Anti-TY1 labelling is still present on all flagella in RNAi induced cells. Nuclei and kinetoplasts (mitochondrial genome) are labelled with DAPI (blue). Scale bars represent 5  $\mu$ m.

## SUPPLEMENTARY TABLES

**Supplementary Table 1. Sperm axonemal abnormalities observed by transmission electron microscopy (TEM) in individuals P<sub>43-8</sub> carrying mutations in CFAP43 and in individual P<sub>44-3</sub> carrying mutations in CFAP44.**

| Individual                        | Normal (9+2) | Abnormal | CPC defects (9+0) | CPC defects (9+1) | CPC defects (8+1) | CPC and DMTs defects |
|-----------------------------------|--------------|----------|-------------------|-------------------|-------------------|----------------------|
| <b>CFAP 43 (P<sub>43-8</sub>)</b> | 4.6 *        | 96.4     | 81.8              | 0                 | 0                 | 13.6                 |
| <b>CFAP 44 (P<sub>44-3</sub>)</b> | 4.8 *        | 95.2     | 66.7              | 9.5               | 0                 | 19                   |
| <b>Control</b>                    | 100          | 0        | 0                 | 0                 | 0                 | 0                    |

Number of section analyzed: 23 sections for fertile control, 21 sections for CFAP44 mutated patient (1 patient) and 22 sections for CFAP43 patient (1 patient).

CPC central pair complex; DMTs Doublets of microtubules

\* Peri-axonemal structures (i.e. longitudinal columns) were mislocalized in all cases; a defect also observed in 4.3% of control sections.

**Supplementary Table 2. Absence of CFAP43 or CFAP44 modulate intensities of staining of different axonemal substructures in mouse and human flagella.**

The following antibodies were used to identify sub-components of the axoneme:  $\alpha$ -RSPH1 and  $\alpha$ -RSPH4A for radial spokes,  $\alpha$ -GAS8 for N-DRC,  $\alpha$ -DNALI1 for IDA,  $\alpha$ -DNAI2 and  $\alpha$ -DNAH5 for ODA,  $\alpha$ -SPAG6 and  $\alpha$ -SPEF2 for CP and  $\alpha$ -AKAP4 for fibrous sheath. ++ intense staining, + intermediate staining, +/- weak

| <b>HUMAN</b>                | <b>Antibody</b>  | <b>Fertile control</b> | <b><i>CFAP43 mutated</i></b><br><b>patients</b> | <b><i>CFAP44 mutated</i></b><br><b>patients</b> |
|-----------------------------|------------------|------------------------|-------------------------------------------------|-------------------------------------------------|
| <b>Radial spoke</b>         | $\alpha$ -RSPH1  | ++                     | atypical                                        | +/--                                            |
|                             | $\alpha$ -RSPH4A | +                      | atypical                                        | +/--                                            |
| <b>Central pair complex</b> | $\alpha$ -SPAG6  | ++                     | -                                               | Atypical<br>weak                                |
| <b>N-DRC</b>                | $\alpha$ -GAS8   | +                      | +                                               | +                                               |
| <b>IDA</b>                  | $\alpha$ -DNALI1 | ++                     | ++                                              | ++                                              |
| <b>ODA</b>                  | $\alpha$ -DNAI2  | ++                     | ++                                              | ++                                              |
| <b>Fibrous sheath</b>       | $\alpha$ -AKAP4  | ++                     | ++                                              | ++                                              |



Supplementary Table 2 (continued)

| MOUSE                | Antibody | WT | <i>Cfap43</i> <sup>-/-</sup> | <i>Cfap44</i> <sup>-/-</sup> |
|----------------------|----------|----|------------------------------|------------------------------|
| Radial spoke         | α-RSPH1  | ++ | -                            | ++                           |
|                      | α-RSPH4A | ++ | -                            | ++                           |
| Central pair complex | α-SPEF2  | +  | -                            | +                            |
| N-DRC                | α-GAS8   | +  | +                            | +                            |
| IDA                  | α-DNAL1  | ++ | ++                           | ++                           |
| ODA                  | α-DNAH5  | ++ | ++                           | ++                           |

**Supplementary Table 3. Protein folds found in the 4 target sequences.**

**WD40 folds are found for all N-ter domains of the proteins using the Superfamily program with very good confidence (e-value corresponds to the probability of finding such folds by chance in the sequence).**

| Protein       | Family                    | Domains (aa number)     | E-value  |
|---------------|---------------------------|-------------------------|----------|
| CFAP44        | WD40 repeat-like          | 234-285,379-398,460-632 | 2.93e-40 |
|               | WD40 repeat-like          | 565-661,740-890         | 3.71e-21 |
|               | WD40 repeat-like          | 146-396                 | 2.23e-20 |
| CFAP43        | WD40 repeat-like          | 110-216,347-503,626-713 | 3.4e-30  |
| Prot-TbCFAP44 | WD40 repeat-like          | 75-249,276-338,392-462  | 1.46e-36 |
|               | WD40 repeat-like          | 389-567,672-748         | 1.47e-15 |
| Prot-TbCFAP43 | WD40 repeat-like          | 228-279,319-466,528-616 | 2.0e-12  |
|               | Tricorn protease domain 2 | 34-281                  | 1.8e-08  |

**Supplementary Table 4. Primers used for *CFAP43* and *CFAP44*'s patients Sanger sequencing verification.**

| Primer name    | Primer sequence (5'-3') | Amplicon Size (bp) |
|----------------|-------------------------|--------------------|
| CFAP43-Ex8-F   | AGGACAGTGCATCTATGCAAAC  | 516 bp             |
| CFAP43-Ex8-R   | TGCAGCATACTCTGCTCCTC    |                    |
| CFAP43-Ex10-F  | TTCAAAAACAACCTGCCACCA   | 409 bp             |
| CFAP43-Ex10-R  | GCACACTGGAAAGGGAGGTA    |                    |
| CFAP43-Ex11-F  | TCCTGTGCCATCTTATGCAG    | 533 bp             |
| CFAP43-Ex11-R  | TGCAAGGACAGACCTGGGTA    |                    |
| CFAP43-Ex16-F  | AAGCCGTGTGGTAGAATTGC    | 464 bp             |
| CFAP43-Ex16-R  | ATCCTAAACCTGCCAATCC     |                    |
| CFAP43-Ex21-F  | AGTGCAAGGTGGCTCAAAGT    | 439 bp             |
| CFAP43-Ex21-R  | GACTGAGCACAGAGGGAAGG    |                    |
| CFAP43-Ex26-F  | TCTAATGTTGGGTGGGAAGC    | 386 bp             |
| CFAP43-Ex26-R  | GCCTCCTCACTTAGCCTCCT    |                    |
| CFAP43- Ex28-F | CAAGTGGGAGCATCTCTGGT    | 434 bp             |
| CFAP43- Ex28-R | GTAAAGGGGAAGGTGCACAA    |                    |
| CFAP43-Ex31-F  | AGGTTTCCAAACCAAGTTGC    | 382 bp             |
| CFAP43-Ex31-R  | ACCGTGCTTACACAGATCCTT   |                    |
| CFAP44-Ex12-F  | ACTTGCGCAAATCACACAG     | 421 bp             |
| CFAP44-Ex12-R  | GGAAAATCCCCAATGCTCT     |                    |
| CFAP44-Ex15-F  | AATGGGGAAAATTGAGCAAG    | 401 bp             |
| CFAP44-Ex15-R  | CTGACCCTCACTGCAGGAAC    |                    |
| CFAP44-Ex21-F  | TTGAAACAGAGCCAATTCCA    | 530 bp             |
| CFAP44-Ex21-R  | GATGCCCAAATAAATGGCTA    |                    |
| CFAP44-Ex23-F  | CAATCCAACCTTTCATGACATCC | 484 bp             |
| CFAP44-Ex23-R  | AGAGGGGCAAGAGATTGAGC    |                    |
| CFAP44-Ex31-F  | GGACATGTCTTCTGGGCTCT    | 443 bp             |
| CFAP44-Ex31-R  | TGAAAAGCTTGGGTGTGATG    |                    |

**Supplementary Table 5. Primers used for RT-qPCR of *CFAP43* and *CFAP44* in human and mouse.**

| <b>Primer names</b>                    | <b>Primer Sequence (5'-3')</b>                  | <b>Tm (C°)</b> |
|----------------------------------------|-------------------------------------------------|----------------|
| <i>CFAP43_5F</i><br><i>CFAP43_6R</i>   | CTGGTAGGCAAAGAGGCAGA<br>TCACAGCCAATGTACAAGTC    | 60             |
| <i>Cfap43_2F</i><br><i>Cfap43_3R</i>   | ATGGCAACTAATGTGCCAGT<br>GCAAAGTAGAGTGTAGTCCAGGA | 60             |
| <i>CFAP44_5F</i><br><i>CFAP44_6R</i>   | CTACCTGCGAAGTAGCAGTG<br>CGAAGGACTCTGTATGGTCT    | 60             |
| <i>Cfap44_15F</i><br><i>Cfap44_16R</i> | TTGCCAGTTGATGTGGTCTC<br>ACACGTTCGGGATTGCAAAC    | 60             |
| <i>ACTB_F</i><br><i>ACTB_R</i>         | CCAACCGCGAGAAGATGA<br>CCAGAGGCGTACAGGGATAG      | 60             |
| <i>Actb_F</i><br><i>Actb_R</i>         | ACCAGAGGCATACAGGGACA<br>CTAAGGCCAACCGTGAAAAG    | 60             |

**Supplementary Table 6. List of primary antibodies used in immunofluorescence experiments in human, mouse and *Trypanosoma***

| Primary antibodies                  | Reference                         | Species | Protein localization     | Dilution               |
|-------------------------------------|-----------------------------------|---------|--------------------------|------------------------|
| <b>Human experiments</b>            |                                   |         |                          |                        |
| DNAI2                               | Abnova H00064446-M01              | mouse   | ODA                      | 1/400                  |
| DNALI1                              | Sigma-Aldrich® HPA028305          | rabbit  | IDA                      | 1/100                  |
| RSPH1                               | Sigma-Aldrich® HPA017382          | rabbit  | RS, head                 | 1/100                  |
| RSPH4A                              | Sigma-Aldrich® HPA031196          | rabbit  | RS, head                 | 1/100                  |
| GAS8                                | Sigma-Aldrich® HPA041311          | rabbit  | N-DRC                    | 1/100                  |
| SPAG6                               | Sigma-Aldrich® HPA038440          | rabbit  | CPC                      | 1/500                  |
| AKAP4                               | Sigma-Aldrich® HPA020046          | rabbit  | FS                       | 1/100                  |
| Acetylated tubulin                  | Sigma-Aldrich® T7451              | mouse   | Microtubules             | 1/2000                 |
| <b>Mouse experiments</b>            |                                   |         |                          |                        |
| Rsph1                               | Sigma-Aldrich® HPA017382          | rabbit  | RS, head                 | 1/100                  |
| Rsph4a                              | Sigma-Aldrich® HPA031196          | rabbit  | RS, head                 | 1/50                   |
| Gas8                                | Sigma-Aldrich® HPA041311          | rabbit  | N-DRC                    | 1/100                  |
| Spef2                               | Sigma-Aldrich® HPA040343          | rabbit  | CPC                      | 1/1000                 |
| Dnali1                              | Sigma-Aldrich® HPA028305          | rabbit  | IDA                      | 1/100                  |
| Dnah5                               | Sigma-Aldrich® HPA037470          | rabbit  | ODA                      | 1/100                  |
| Mpc1l                               | Described in (1)                  | rabbit  | Mitochondria             | 1/500                  |
| Acetylated tubulin                  | Sigma-Aldrich® T7451              | mouse   | Microtubules             | 1/500                  |
| <b><i>T. brucei</i> experiments</b> |                                   |         |                          |                        |
| myc                                 | Santa Cruz monoclonal 9E10, sc-40 | mouse   | Myc-tagged proteins      | 1/10                   |
| PFR2                                | Gift of Dr N. Biteau (2)          | rabbit  | PFR / flagellum          | 1/2000; 1/400 (STED)   |
| mAb25 (TbSAXO)                      | Described in (3)                  | mouse   | Microtubules/axoneme     | 1/5                    |
| BB2 (TY1)                           | Described in (4)                  | mouse   | TY1-tagged proteins      | 1/500 (IF); 1/10 (iEM) |
| TAT1 (tubulin)                      | Described in (4)                  | mouse   | Cytoskeleton / flagellum | 1/50 (IF); 1/10 (iEM)  |
| L8C4 (PFR2)                         | Described in                      | mouse   | PFR / flagellum          | neat                   |

Abbreviations are as follows : ODA, Outer Dynein Arms ; IDA, Inner Dynein Arms ; RS, Radial Spokes ; FS, Fibrous sheath ; CPC, Central Pair Complex;



(1) Vanderperre et al, (2016) MPC1-like Is a Placental Mammal-specific Mitochondrial Pyruvate Carrier Subunit Expressed in Postmeiotic Male Germ Cells. *J Biol Chem.* 2016 Aug 5;291(32):16448-61. doi: 10.1074/jbc.M116.733840.

(2) Laboratoire de Microbiologie Fondamentale et Pathogénicité UMR5234-CNRS F-33076  
BORDEAUX

(3) D. Dacheux et al., (2012) A MAP6-Related Protein Is Present in Protozoa and Is Involved in Flagellum Motility,” *PLoS One* 7 (2): e31344, doi:10.1371/journal.pone.0031344.

(4) Bastin et al., “A Novel Epitope Tag System to Study Protein Targeting and Organelle Biogenesis in *Trypanosoma Brucei*,” *Mol Biochem Parasitol* 77, no. 2 (1996): 235–39.

(5) Linda Kohl, Trevor Sherwin, and Keith Gull, “Assembly of the Paraflagellar Rod and the Flagellum Attachment Zone Complex During the *Trypanosoma Brucei* Cell Cycle,” *Journal of Eukaryotic Microbiology* 46, no. 2 (March 1, 1999): 105–9, doi:10.1111/j.1550-7408.1999.tb04592.x.

**Supplementary Table 7. Endogenous tagging and RNAi primer sequences for *T. brucei* experiments**

**3xmyc C-terminal endogenous tagging primers**

***TbCFAP44***

5'-

GGAAATTGATGCACTGAGAACAGAAGTTGCACTCCTACGTACGAAGGGTGGACACGTGTATGCCGCTGCTAT  
GGCAGCCGGCAGGggtaccgggccccctcgag-3'

5'-

CACTCTTCCCAAATACATACTGGTATTGAAGCGCTTCGCTGTTCTGTGATGGTGCCAAGGCACAACATAGAGAG  
AAACTAGCAGCtggcggccgctctagaactagtgat-3'

***TbCFAP43***

5'-

ACTTGTTGCGCTTAAAAACGAGGTAGATCGCTTGCGTGAGGCCACATTTCCCTCATTTGCTGTTGTTACGAGGA  
GGACCGCCAGAggtaccgggccccctcgag-3'

5'-

CTTCCTTCTGCCACTTGTCCGAATAACGCCGACTTCTGCCTCACTTGCCCCCTCGCCAGTGTCAGCAGGGCAC  
CGCCAtggcggccgctctagaactagtgat-3'

**RNAi primers:**

***TbCFAP44*** (target bp 1880-2309 within the ORF)

5'-GCCGCGCGCTCTAGAgggccggtggagtagagct-3'

5'-TAAGCTTGCTCTAGAggttggagttgggcaacagg-3'

***TbCFAP43*** (target bp 131-596 within ORF)

5'-GCCGCGCGCTCTAGActtgtgaaggccgc-3'

5'-TAAGCTTGCTCTAGAgacctcagtgccccatacg-3'

**RT-PCR primers**

***TbCFAP44***

5'-GGCTATTTTCGCTTCTGGCG -3'

5'-GCTTCGTCACAGCGTTGTTT -3'

***TbCFAP43***

5'-AGAGACTGAACAGGCGCTTC -3'

5'-TCGCTCACCATAGCGTTCTC -3'

***TbTERT***

5'-GAGCGTGTGACTTCCGAAGG-3'

5'-AGGAACTGTCACGGAGTTTGC -5'

**Supplementary Table 8. Guide RNA sequences for CRISPR/Cas9 mice generation.**

| <b>Gene</b>   | <b>Exon targeted</b> | <b>Guide RNA sequence (5'-3')</b> |
|---------------|----------------------|-----------------------------------|
| <i>Cfap43</i> | exon 2               | AATGTGCCCAAGTGAAGTCG              |
|               | exon 21              | CTCCATGGCTGTGAAGGGC               |
| <i>Cfap44</i> | exon 3               | CAGCTGACTCATATACCGA               |
|               | exon 15              | AGAAAGAATACAAGCCGA                |

**Supplementary Table 9. Primers for CRISPR/Cas9 mice genotyping.**

| <b>Gene</b>          | <b>Method</b>     | <b>PCR Primer Name</b> | <b>PCR Primer sequence</b> | <b>Tm (°C)</b> |
|----------------------|-------------------|------------------------|----------------------------|----------------|
| <b><i>Cfap43</i></b> | Sanger sequencing | Wdr96m_2F              | CAAAGATGGGTGCAAGGATT       | 56             |
|                      |                   | Wdr96m_2R              | AGCAGGGGGAAGAATGAACT       | 56             |
|                      |                   | Wdr96m_21F             | GTGCAGGGGAATCCTGTAAA       | 58             |
|                      |                   | Wdr96m_21R             | AGCAGGGGGAAGAATGAACT       | 59             |
|                      | HRM               | 96HRM_21F              | TGTGGAGATGCACAACCTGG       | 58             |
|                      |                   | 96HRM_21R              | GTCGGAGGCTGTGTGTCTCT       | 61             |
| <b><i>Cfap44</i></b> | Sanger sequencing | Wdr52mT1_3F            | TCTATACACGAAGCTTCACAAGACA  | 60             |
|                      |                   | Wdr52mT1_3R            | AGAAACAGAATGTAGAACCCCTGA   | 59             |
|                      | HRM               | 52HRM_3F               | CGAAGCTTCACAAGACACCA       | 58             |
|                      |                   | 52RHRM_3R              | GCAGGAGCCTGAACGTACTC       | 60             |

**Supplementary Table 10. List of primers used for RT-PCR experiments for *Cfap43* and *Cfap44*.**

| <b>Primer name</b> | <b>Exons</b> | <b>Primer sequence (5'-3')</b> | <b>Tm</b> |
|--------------------|--------------|--------------------------------|-----------|
| Cfap43_E20-21F     | 20-21        | GGAGGAAGTAGCGAAGATAA           | 60        |
| Cfap43_E22R        | 22           | CAACTCCTGTAGCTCCTCTT           | 60        |
| Cfap44_E2F         | 2            | ATATGAAGGAGCCAGATGAC           | 60        |
| Cfap44_E3R         | 3            | CGTACTCTTGAGATGAATGC           | 60        |
